# Supplementary material for: Prevention and Treatment of Chemotherapy-Induced Peripheral Neuropathy (CIPN) with Non-Pharmacological Interventions: Clinical Recommendations from a Systematic Scoping Review and an Expert Consensus Process
Source: Med Sci (Basel). 2023 Jan 30;11(1):15. doi: 10.3390/medsci11010015 (PMC9944490; doi:10.3390/medsci11010015)
Supplement: Supplementary file 1 [file medsci-11-00015-s001.zip]

Archive with 6 entries (6 files):
- Supplementary S1, PRISMA-ScR Checklist.pdf
- Supplementary S2, Search strategy.pdf
- Supplementary S3, Table S1.pdf
- Supplementary S4, Table S2.pdf
- Supplementary S5, Table S3.xlsx
- Supplementary S6, Table S4.pdf
