# Supplementary material for: Prevention and Treatment of Chemotherapy-Induced Peripheral Neuropathy (CIPN) with Non-Pharmacological Interventions: Clinical Recommendations from a Systematic Scoping Review and an Expert Consensus Process
Source: Med Sci (Basel). 2023 Jan 30;11(1):15. doi: 10.3390/medsci11010015 (PMC9944490; doi:10.3390/medsci11010015)
Supplement: Supplementary file 1 [file medsci-11-00015-s001.zip › Supplementary S5, Table S3.xlsx]

## Sheet: CASP_RCT
CASP-RCT (2017) (items 7 and 8 from Version 2020)	1. Are the results valid?	2. Was the assignment of patients to treatments randomized?	3. Were of all of the patients who entered the trial properly accounted for at its conclusion?	4. Were patients, health workers and study personnel 'blind' to treatment?	5. Were the groups similar at the start of the trial?	6. Aside from the experimental intervention, were the groups treated equally?	7. Were the effects of intervention reported comprehensively?	7a. Was a power calculation undertaken?	7b.What outcomes were measured, and were they clearly specified?	7c. How were the results expressed? For binary outcomes, were relative and absolute effects reported?	7d. Were the results reported for each outcome in each study group at each follow-up interval?	7e.Was there any missing or incomplete data?	7f. Was there differential drop-out between the study groups that could affect the results?	7g. Were potential sources of bias identified?	7h. Which statistical tests were used?	7i. Were p values reported?	8. Was the precision of the estimate of the intervention or treatment effect reported?	8a. Were confidence intervals (CIs) reported?	9. Can the results be applied in your context? (or to the local population?)	10. Were all clinically important outcomes considered?	11. Are the benefits worth the harm and costs?		Study quality (includes risk of bias, transferability, consistency)**
Table 2:
Arslan et al. 2020 [17]	Yes	Yes	Yes	Yes	Yes	Yes	Yes	Yes	s. Table 2 for study details	Effect size of score changes	Yes	No	No	No	Changes in the peripheral neuropathy state of the intervention and control groups were assessed by group, time, and group × time interaction by conducting two way Analysis of Variance during the repeated measures.	Yes	Yes	Yes	Yes	Yes	Yes		Excellent
Bandla et al. 2019 [18]	Yes	No	Yes	No	Yes	Yes	Yes	No	s. Table 2 for study details	Comparison of skin temperature and nerve changes	Yes	No	No	No	descriptive statistic, Welch’s t test	Yes	No	No	Yes	Yes	Yes		Good
Beijers et al. 2020 [39]	Yes	Yes	Yes	No	Yes	Yes	Yes	Yes	s. Table 2 for study details	ITT, PP	Yes	No	Can´t tell	No	intention-to-treat and per protocol analysis	Yes	Yes	Yes	Yes	Yes	Yes		Good
Griffiths et al. 2018 [19]	Yes	Yes	Yes	No	Yes	Yes	Yes	Yes	s. Table 2 for study details	Mean scores ± standard error of mean	Yes	No	Yes	No	Paired t tests were used to compare scores on intervention and control extremities, and percentages were analyzed with theMcNemar test	Yes	No	No	Can't tell	Yes	Can't tell		Satisfactory
Izgu et al. 2019a [33]	Yes	Yes	Yes	No	Yes	Yes	Yes	Yes	s. Table 2 for study details	Comparison of patient reported outcome measures between in the study groups over time	Yes	No	No	No	The Shapiro-Wilk test, histogram, and normal Q-Q plot were used for tests of normality. The baseline variables including age, S-LANSS and EORTC QOL CIPN20 scores with the two-sample t-test of the difference between groups, and time since diagnosis, body mass index, NCS findings were analyzed using Mann Whitney U test. We compared educational level, marital status, and stage of breast cancer betwe…	Yes	Yes	Yes	Yes	Yes	Yes		Excellent
Izgu et al. 2019b [101]	Yes	Yes	Yes	No	Yes	Yes	Yes	Yes	s. Table 2 for study details	ITT	Yes	No	No	Yes	Shapiro-Wilk test, Mann-Whitney U test, Chi-Quadrat test, Friedman test, intention-to-treat analysis	Yes	Yes	No	Yes	Yes	Yes		Good
Kotani et al. 2021 [43]	Yes	Yes	Yes	Yes	Yes	Yes	Yes	Yes	s. Table 2 for study details	Difference in the frequency of CIPN	Yes	No	Yes	Yes	McNemar's chi-squared test, paired t-tests	Yes	No	No	Can't tell	Yes	Yes		Good
Noh & Park 2019 [50]	Yes	Yes	Yes	No	Yes	Yes	Yes	Yes	s. Table 2 for study details	Pre-post outcome and Intervention Effects	Yes	No	No	No	Chi-square tests, independent t-test, Fisher's exact test	Yes	Yes	Yes	Yes	Yes	Yes		Excellent
Rostami et al. 2019 [75]	Yes	Yes	Yes	Yes	Yes	Yes	Yes	Yes	s. Table 2 for study details	total and mean scores	Yes	No	No	No	mean ± standard deviation or number, Mann–Whitney U tests, Wilcoxon signed‐rank test	Yes	No	Yes	Yes	Yes	Yes		Good
Sarisoy et al. 2020 [76]	Yes	Yes	Yes	No	Yes	Yes	Yes	Yes	s. Table 2 for study details	pre- and post test scores	Yes	No	No	No	mean ± standard deviation or number, Shapiro-Wilk test, Wilcoxen, Firedman, t-test, Mann Whitney U test,	Yes	Yes	No	Yes	Yes	Yes		Good
Sundar et al. 2017 [40]	Yes	Yes	Yes	No	Yes	Yes	Yes	Yes	s. Table 3 for study details	Temporal trend	Yes	No	No	no	mean ± standard deviation or number, t-test, Pearson´s coreelation,	Yes	Yes	No	Yes	Yes	Yes		Good
Table 3:
Aghabati et al. 2010 [104]	Yes	Yes	Yes	Can't tell	Yes	Yes	Can´t tell	Yes	s. Table 3 for study details	pre- and post test scores	yes	No	No	No	descriptive statistics, Tukey HSD test to locate the differences, ANOVA	Yes	Yes, reported in scores	No	Yes	Yes	Yes		Good
Andersen et al. 2020 [38]	Yes	Yes	Yes	No	Yes	Yes	Yes	Yes	s. Table 3 for study details	pre- and post test scores	Yes	No	Can´t tell	No	mixed models analysis, which accounts for repeated measurements, unequal time intervals, and data missing at random. Patient questionnaires and quantitative sensory testing evaluated the treatment effect throughout chemotherapy to 6 months post treatment	Yes	Yes, reported in scores and OR	Yes	Yes	Yes	Yes		Good
Coyne et al. 2013 [67]	Yes	No	Yes	No	Can't tell	Yes	Yes	No	s. Table 3 for study details	No	Yes, but this is a single-group study	No	No	No	descriptive statistics, variance, Pair-wise comparisons between the time points, Tukey’s HSD procedure	Yes	Yes, reported in scores	No	Yes	Yes	Yes		Satisfactory
Cunningham et al. 2011 [74]	Can't tell	Can't tell	Yes	Can't tell	Can't tell	Can't tell	Can't tell	Can't tell	s. Table 3 for study details	pre- post measurment (temperature)	Can't tell	No	Can't tell	No	no statistical test was used	Yes	Yes, reported in temperature change	Can't tell	Yes	Can't tell	Yes		Poor
Dikmen & Terzioglu 2019 [45]	Yes	Yes	Yes	No	Yes	Yes	Yes	Yes	s. Table 3 for study details	Differences between symptom scores	Yes	No	No	No	Independence two-sampling t test, one-way analysis of variance (ANOVA) test	Yes	Yes	Yes	Yes	Yes	Yes		Excellent
Donald et al. 2011 [68]	Yes	No	Yes	No	Yes	Yes	No	No	s. Table 3 for study details	Descriptive only, percent	Yes	No	No	No	Evaluation after six weeks after intervention	No	No	No	Yes	Yes	Yes		Satisfactory
Doorenbos et al. 2005 [79]	Yes	Yes	Yes	Can't tell	Yes	Yes	Can´t tell	No	s. Table 3 for study details	overall symptom limitation index, scores based on questionnaires	Yes	Can´t tell	Yes	No	descriptive statistics, two-level, hierarchical linear model (HLM)	Yes	Yes	No	Yes	Yes	Yes		Good
Dyer et al. 2013 [46]	Yes	Yes	Yes	No	Yes	Yes	Yes	Yes	s. Table 3 for study details	Difference in the mean change between groups	Yes	No	No	No	One-tailed independent samples t-test	Yes	Yes	Yes	Yes	Yes	Yes		Excellent
Fernandes & Kumar 2016 [69]	Yes	No	Yes	No	Yes	Can´t tell	Can´t tell	Can´t tell	s. Table 2 for study details	pre- and post-test scores	Yes, but this is a single-group study	No	No	No	descriptive statistics, t-test	Yes	Yes	No	Yes	Can´t tell	Yes		Satisfactory
Galantino et al. 2019* [80]	Yes	No	Yes	No	Yes	Yes	No	Yes	s. Table 3 for study details	Improvements in Primary Clinical Outcome Measures, Changes in Secondary Outcome Measures	Yes	No	No	No	Paired t-tests and Wilcoxon rank sum tests	Yes	No	No	Yes	Yes	Yes		Good
Gewandter et al. 2019* [65]	Yes	No	Yes	No	Yes	Yes	Yes	Yes	s. Table 3 for study details	Score changes from baseline median to 6-weeks median	Yes	No	No	No	Percent changes from baseline, Paired Wilcoxon signed rank test	Yes	Yes	Yes	Yes	Yes	Yes		Excellent
Giasson & Bouchard 1998 [81]	Yes	Yes	Yes	No	Yes	Yes	Yes	No	s. Table 3 for study details	mean scores before and after treatment	Yes	No	No	Yes	Chi-square tests, t-test, ANOVA	Yes	Yes	No	Can´t tell	Yes	Yes		Good
Gok Metin et al. 2017 [47]	Yes	Yes	Yes	Yes	Yes	Yes	Yes	Yes	s. Table 3 for study details	Changes in symptom scores during the study	Yes	No	No	No	Percentages, frequencies, means, standard deviations, and medians were used to define sample characteristics. The Mann-Whitney U test was used to define differences between the intervention and control groups.	Yes	Yes	Yes	Can't tell	Yes	Yes		Excellent
Grealish et al. 2000 [105]	Yes	No	Yes	No	Yes	Yes	Yes	Yes	s. Table 3 for study details	Mean scores before and after treatment	Yes	No	No	No	Means and standard deviations, ANOVA	Yes	No	No	Yes	Yes	Yes		Good
Kleckner et al. 2018 [48]	Yes	Yes	Yes	No	Yes	Yes	No	Yes	s. Table 3 for study details	Testing the effect of exercise on CIPN, change score (post minus pre)	Yes	No	No	No	t tests and χ2 tests for continuous and nominal characteristics, linear regression	Yes	Yes	Yes	Yes	Yes	Yes		Excellent
Koch 2015 [82]	Yes	Yes	Yes	No	Yes	Yes	Yes	Yes	s. Table 3 for study details	chande in outcome over intervention period	Yes	No	No	No	two-tailed Wilcoxon–Test, deskriptive statistics.	Yes	Yes	Yes	Yes	Yes	Yes		Good
Kutner et al. 2008 [49]	Yes	Yes	Yes	Yes	Yes	Yes	Yes	Yes	s. Table 3 for study details	change in outcome, immediate and over three weeks	Yes	No	No	No	mixed-effect model	Yes	Yes	Yes	Yes	Yes	Yes		Excellent
Kwekkeboom 2001* [70]	Yes	Yes	Yes	No	Yes	Yes	Yes	No	s. Table 3 for study details	Means, standard deviations, medians, ranges, and frequencies	Yes	Can´t tell	No	No	Wilcoxon signed ranks tests, Kruskal-Wallis and Mann-Whitney tests	Yes	No	No	Yes	Yes	Yes		Satisfactory
Listing et al. 2009 [83]	Yes	Yes	Yes	No	Yes	Yes	Yes	No	s. Table 3 for study details	change in outcome, over five week intervention and follow up 6 weeks. Mean differences.	Yes	No	Yes	Yes	multivariate analysis	Yes	Yes	Yes	Yes	Yes	Yes		Good
Loprinzi et al. 2020 [65]	Yes	Yes	Yes	No	Yes	Yes	Yes	No	s. Table 3 for study details	change in outcome for the 2 treatment weeks and the 8 follow-up weeks. Longitudinal plots of percent changes in mean scores.	Yes	Yes	No	Yes	Descriptive statistics (mean, standard deviation, median, range)	Yes	Yes	No	Y es	Yes	Yes		Satisfactory
McCrary et al. 2019 [84]	Yes	Yes	Yes	No	Yes	Yes	Yes	Yes	s. Table 3 for study details	mean ± standard error. Outcomes before and after an 8-week exercise intervention and a preceding 8-week control period	Yes	No	No	No	Repeated measures ANOVAs, least significant difference (LSD) post hoc test, t-test	Yes	No	No	Yes	Yes	Yes		Good
Moore et al. 2002 [85]	Yes	Yes	Yes	No	Yes	Yes	Yes	Yes	s. Table 3 for study details	Median outcome scores	Yes	No	Yes	No	Mann­Whitney U test, Kaplan­Meier survival analysis, log rank test,	Yes	Yes	No	Yes	Yes	Yes		Good
Ostermann et al. 2008 [86]	Yes	Yes	Yes	No	Yes	Yes	Yes	No	s. Table 3 for study details	mean score, changes over the time	Yes	No	No	No	t test statistics by Mee and Chua,	Yes	Yes	Yes	No	Yes	Yes		Good
Post-White et al. 2003 [87]	Yes	Yes	Yes	No	Yes	Yes	Yes	Yes	s. Table 3 for study details	Pre-post outcome and Intervention Effects Over 4 Weeks	Yes	No	Yes	Yes	"ANOVA, χ2 test, carryover effects by grizzle, Mann-Whitney U, area under the curve (AUC), Tukey’s HSD, Kruskal-Wallis ANOVA, Wilcoxon matchedpairs signed-rank test (nonparametric). Repeatedmeasures analysis (GLM, SPSS 10.0)"	Yes	Yes	No	Yes	Yes	Yes		Good
Rostock et al. 2013 [88]	Yes	Yes	Yes	Yes	Yes	Yes	Yes	Yes	s. Table 3 for study details	pre- and post test scores	Yes	No	No	Yes	t-test, power calculation, ANCOVA	Yes	Yes	Yes	Yes	Yes	Yes		Good
Schönsteiner et al. 2017 [89]	Yes	Yes	Yes	Yes	Yes	Yes	Yes	No	s. Table 3 for study details	archievement of mormal value >10s	Yes	Yes	Yes	No	Mann-Whitney U test, Fisher´s exact test, Spearmans rank correlation, Wilcoxon signed rank test	Yes	Yes	Yes	Yes	Yes	Yes		Good
Schwenk et al. 2016 [90]	Yes	Yes	Yes	Yes	Yes	Yes	Yes	Yes	s. Table 3 for study details	Means, standard deviations, medians, ranges, and frequencies	Yes	No	No	No	χ2 test, analysos of covariance, linear regression, multivariate regression model,	Yes	Yes	No	Yes	Yes	Yes		Good
Stephenson et al. 2003 [77]	Yes	Yes	Yes	No	Yes	Yes	Yes	Yes	s. Table 2 for study details	pre- and post test scores, yes/no questionaire, opioid converter	Yes	No	No	No	descriptive statistics, t-test	Yes	Yes	No	Yes	Yes	Yes		Good
Uehleke et al. 2008 [91]	Yes	Yes	Yes	No	Yes	Yes	Yes	No	s. Table 3 for study details	Descriptive only. Symptom Scores pre-post.	Yes	No	No	Yes	descriptive statistics, t-test	Yes	No	No	Yes	Yes	Yes		Good
Vadiraja et al. 2009 [88]	Yes	Yes	Yes	Yes	Yes	Yes	Yes	Yes	s. Table 3 for study details	mean score before and after treatment	Yes	No	Yes	No	descriptive statistics, ANOVA, statistical Package fpr Socila Scinence, Bonferroni´s correction, Pearson´s correlation	Yes	Yes	Yes	Yes	Yes	Yes		Good
Wong et al. 2016 [93]	Yes	Yes	Yes	No	Yes	Yes	Yes	Yes	s. Table 3 for study details	Pre-post outcome and Intervention Effects Over 4 Weeks	Yes	No	No	No	intentionto treat analysis, 1-way ANOVA test,	Yes	Yes	No	Yes	Yes	Yes		Good
Wyatt et al. 2017 [78]	Yes	Yes	Yes	No	Yes	Yes	Yes	Yes	s. Table 2 for study details	pre- and post test scores	Yes	No	No	No	descriptive statistics, intent to treat, Linear mixed-effects (LME),	Yes	Yes	No	Yes	No	Yes		Good
Zimmer et al. 2018 [94]	Yes	Yes	Yes	Yes	Yes	Yes	Yes	Yes	s. Table 3 for study details	pre- and post test scores	Yes	No	Yes	Yes	Mann­Whitney U test, ANOVA,	Yes	Yes	No	Yes	Yes	Yes		Good
[Numeration is based on reference list]
Note.
Question 7. b, all study details can be found in Tables 2 and 3
Questions 7. e, f, g, "no" = positive meaning
Question 9. Tranferability is only given if the study reports on oncological patients
* These studies were mixed-methods studies and have been evaluated with CASP RCT and CASP Qualitative.
** "excellent study quality" = 21-20 points, "good study quality" = 19-16 points, "satisfactory study quality" = 15-12 points, "poor study quality" = < 12 points
Further explanation to use the CASP tool.
All included studies were assessed using the Critical Appraisal Skills Program (CASP) [28], which consists of a set of criteria to proof, and is available for different study types. For instance, the CASP Randomised Controlled Trials Checklist (2017) entails 11 questions regarding the quality of the study (e.g., question 2: “Was the assignment of patients to treatments randomized?”, or question 9…

## Sheet: CASP_Review
CASP-Systematic Review	1. Did the review adress a clearly focused question?	2. Did the authors look for the right type of papers?	3. Do you think all the important, relevant papers were included?	4. Did the review's authors do enough to assess the quality of the included studies?	5. If the results of the review have been combined, was it reasonable to do so?	6. What are the overall results of the review?	7. How precise are the results?	8. Can the results be applied to the local population?	9. Were all important outcomes considered?	10. Are the benefits worth the harms and the costs?		Study quality (includes risk of bias, transferability, consistency)**
Table 2:
Li et al. 2019 [35]	Yes	Yes	Yes	Yes	Yes	Results proves to be encouraging. More double-blind,multicenter, large-scale RCTs are required.		Yes	Yes	Yes		Excellent
Noh et al. 2018 [36]	Yes	Yes	Yes	Yes	Yes	Herbal medicines, in combination with and without other therapies, have potentially preventive and/or therapeutic effects for CIPN.		Yes	Yes	Yes		Excellent
Table 3:
Armstrong et al. 2005 [102]	Yes	yes	No	No	Yes	management of neuropathic pain and interventions to improve functional status have not been achieved	Search strategy not reported	Yes	Yes	Yes		Good
Bardia et al 2006 [15]	Yes	Yes	Yes	Yes	Yes	trials reported significant benefit for the following CAM therapies: acupuncture (n=1), support groups (n = 2), hypnosis (n = 1), relaxation/imagery (n = 2), and herbal supplement/HESA-A (n = 1)	Results based on 18 trials(eight poor, three intermediate, and seven high quality) Jadad score	Yes	Yes	Yes		Excellent
Boyd et al. 2016 [51]	Yes	Yes	Yes	Yes	Yes	massage therapy is effective for treating pain compared to no treatment and active comparators. Compared to active comparators, massage therapy was also found to be beneficial for treating fatigue	Twelve high quality and four low quality studies were subsequently included in the review.	Yes	Yes	Yes		Excellent
Brami et al. 2016 [16]	Yes	Yes	Yes	No	Yes	12 RCTs evaluated natural products and one evaluated electroacupuncture	More information on the study quality needed.	Yes	Yes	Yes		Good
Buffart et al. 2012 [52]	Yes	Yes	Yes	Yes	Yes	large reductions in distress, anxiety, and depression, moderate reductions in fatigue, moderate increases in general quality of life, emotional function and social function, and a small increase in functional well-being. Effects on physical function and sleep were small and not significant.	16 publications of 13 RCTs were included, All but one study were of high quality, The median quality score was 67% (range: 22–89%).	Yes	Yes	Yes		Excellent
Deng et al. 2013 [53]	Yes	Yes	Yes	Yes	Yes	complementary therapy modalities can be helpful in improving the overall care of patients with lung cancer (effect small-moderate)	Methodologic quality of the most studies was poor of most of the included trials was poor	Yes	Yes	Yes		Excellent
Dy 2010 [95]	Yes	Yes	Yes	Yes	Yes	systematic review of the RCT literature on acupuncture for pain found only a very small difference, which was not clinically meaningful; some studies did find a moderate effect of placebo acupuncture, suggesting that the therapeutic relationship may be an important factor in reducing pain.	Can't tell	Yes	Can´t tell	Yes		Good
Ernst 2009 [72]	Yes	Yes	No	No	Yes	There is not enough evidence to demonstrate convincingly that reflexology is an effective treatment for any medical condition.	The results need to be updated.	Can't tell	Yes	Yes		Satisfactory
Hökkä et al. 2014 [100]	Yes	Yes	Yes	No	Yes	Limited evidence that some of the nonpharmacological interventions help to reduce cancer pain over the longer term	The results need to be updated.	Can't tell	Yes	Yes		Good
Jane et al. 2008 [103]	Yes	Yes	Yes	Yes	Yes	Massage interventions have the potential to reduce pain.	The results need to be updated.	Can't tell	Yes	Yes		Good
Kanzawa-Lee et al. 2020 [54]	Yes	Yes	Yes	Yes	Yes	Although promising, the empirical evidence is insufficient to definitively conclude that exercise interventions ameliorate CIPN.	Very sound and detailed analysis	Yes	Yes	Yes		Excellent
Kim et al. 2010 [99]	Yes	Yes	Yes	Yes	Can´t tell	Favorable effects of reflexology on pain is suggested. Future studies should include adequate control interventions.	The results need to be updated.	Yes	Yes	Yes		Good
Kim et al. 2011 [55]	Yes	Yes	Yes	Yes	Yes	Some suggestive evidence for the effecitevness of cupping.	The results need to be updated.	Yes	Yes	Yes		Excellent
Lee et al. 2015 [56]	Yes	Yes	Yes	Yes	Yes	Among the various types of massage, foot reflexology appeared to be more effective than body or aroma massage.	The results need to be updated.	Yes	Yes	Yes		Excellent
Mishra et al. 2012 [57]	Yes	Yes	Yes	Yes	Yes	Exercise interventions resulted in decreased	Detailed Analysis. The searches have been updated to May 2019, no change to conclusions.	Yes	Yes	Yes		Excellent
Olsson Möller et al. 2019 [64]	Yes	Yes	Yes	Yes	Yes	Positive effects of exercise/PA on pain. Solid effect.	Detailed analysis of a broad scope of rehabilitation interventions.	Yes	Yes	Yes		Excellent
Pan et al. 2013 [58]	Yes	Yes	Yes	Yes	Yes	Meta-analysis revealed a significant improvement in pain by massage.	Sound and detailed analysis	Yes	Yes	Yes		Excellent
Stier-Jarmer et al. 2021 [59]	Yes	Yes	Yes	Yes	Yes	Kneipp therapy seems to be effective in numerous complaints e.g. sleep disorders.With regard to disease-related polyneuropathic no significant group differences were found	Detailed overview of the current state of research on the subject of Kneipp therapy.	Cant`tell	Yes	Yes		Excellent
Streckmann et al. 2014 [60]	Yes	Yes	Yes	Yes	Yes	Balance exercises showed the highest effect on the motor as well as sensory symptoms in all types of PNP.	Sound and detailed analysis	Yes	Yes	Yes		Excellent
Telles et al. 2019 [73]	Yes	Yes	No	No	Yes	Yogic practices could be used in managing SCI induced NP pain by regulating the action of various mechanisms and its associated molecules.	More information on the molecular pathways are needed.	Can't tell	Yes	Yes		Satisfactory
Tofthagen et al. 2012 [96]	Yes	Yes	Can´t tell	Yes	Yes	beginning evidence to support strengh and balance training für patients with polyneuropathy, no study for treatment for CIPN,	More Studies for the treatment in CIPN are needed	Yes	Yes	Yes		Good
van Vu et al. 2017 [61]	Yes	Yes	Yes	Yes	Yes	low significant effects for symptoms how fatigue, Quality of life etc.	Detailed analsysis	Yes	Yes	Yes		Excellent
Verhulst et al. 2015 [97]	Yes	Yes	Yes	Can´t tell	Yes	Reduction of pain in two studies, strengh and balance decriebed in two studies	potential role for WBV in the rehabilitaiton for CIPN, evidence is needed	Yes	Yes	Yes		Good
Wayne et al. 2018 [62]	Yes	Yes	Yes	Yes	Yes	effects of Tai Chi and Qi Gong for Fatigue, Sleep, Despression and Pain and QoL,	results based on 15 studies, not the same measurements in studies for the same outcome	Yes	Yes	Yes		Excellent
[Numeration is based on reference list]
Note.
** "excellent study quality" = 10-9 points, "good study quality" = 8-6 points, "satisfactory study quality" = 5-3 points, "poor study quality" = < 3 points

## Sheet: CASP_Qualitative
CASP-Qualitative Research	1. Was there a clear statement of the aims of the research?	2. Is a qualitative methodology appropriate?	3. Was the resarch design appropriate to address the aims of the research?	4. Was the recruitment strategy appropriate to the aims of the research?	5. Was the data collected in a way that addressed the research issue?	6. Has the relationship between researcher and participants been adequately considered?	7. Have ethical issues been taken into consideration?	8. Was the data analysis sufficiently rigorous?	9. Is there a clear statement of findings?	10. How valuabe is the research?		Study quality (includes risk of bias, transferability, consistency)**
Table 3:
Galantino et al. 2019* [80]	Yes	Yes	Yes	Yes	Yes	Can´t tell	Yes	Can´t tell	Yes	This pilot study indicates that a fully powered randomized controlled trial is needed.		Good
Gewandter et al. 2019* [65]	Yes	Yes	Yes	Yes	Yes	Can´t tell	Yes	Can´t tell	Yes	This feasibility study can be used to conduct a controlled trial		Good
Kwekkeboom 2001* [70]	Yes	Yes	Yes	Yes	Yes	Can´t tell	Can´t tell	No	Yes	Future research should continue to explore factors that lead persons to seek other methods for coping with their pain and distress. and interpret behavioral cues that indicate pain in particular patients.		Good
[Numeration is based on reference list]
Note.
* These studies were mixed-methods studies and have been evaluated with CASP RCT and CASP Qualitative.
** "excellent study quality" = 10-9 points, "good study quality" = 8-6 points, "satisfactory study quality" = 5-3 points, "poor study quality" = < 3 points

## Sheet: Guidelines_BehrensLanger
Critical evaluation of standards and guidelines (Behrens & Langer, 2010)	1. Is the topic of the guideline clearly formulated?	2. How was the guideline created?	3. Were all important options and results clearly described and assessed in a comprehensible way?	4. Does the guideline incorporate important recent developments?	5. Was the guideline peer-reviewed and tested?	6. Were specific recommendations made that are important to practice?	7. How good was the search?	8. How good were the individual studies?	9. Do the results of different studies agree?	10. Is the main goal of the guideline the same as my goal?	11. Are the recommendations applicable to my patients?		Study quality (includes risk of bias, transferability, consistency)**
Table 2:
Clinical guideline S3 Supportive Therapy 2020 [37]	Yes	Detailed description of the individual steps	Yes	Yes	Yes	Yes	Comprehensive research strategy	low quality, only Expert Konsensus	Yes	Yes	Yes		Excellent
Table 3:
Denlinger et al. Survivorship, Version 2.2019 [98]	Yes	Expert panel	Yes	Can´t tell	Yes	Yes	Can´t tell	Partly study type not mentioned, partly inclusion of high quality	Yes	No	Yes		Good
Greenlee et al. 2017 Clinical practice guideline breast cancer [42]	Yes	Detailed description of the individual steps	Yes	Yes	Yes	Yes	Comprehensive research strategy	Some could be used to make Grade A and B recommendations.	Yes	Yes	Yes		Excellent
Clinical guideline S3 Complementary medicine in the treatment of oncology patients 2021 [63]	Yes	Detailed description of the individual steps	Yes	Yes	Yes	Yes	Comprehensive research strategy	From poor to high quality	Yes	Yes	Yes		Excellent
Clinical guideline S3 Supportive Therapy 2020 [37]	Yes	Detailed description of the individual steps	Yes	Yes	Yes	Yes	Comprehensive research strategy	low quality, only Expert Konsensus	Yes	Yes	Yes		Excellent
Expert standard for pain management in nursing 2020 [66]	Yes	Detailed description of the individual steps	Yes	Yes	Yes	Yes	Comprehensive research strategy	mostly low quality	No	Yes	Yes		Excellent
[Numeration is based on reference list]
Note.
** "excellent study quality" = 11-10 points, "good study quality" = 9-7 points, "satisfactory study quality" = 6-4 points, "poor study quality" = < 4 points
***category 2A = Based upon lower-level evidence, there is uniform NCCN consensus that the intervention is appropriate.
****category 1 = Based upon high-level evidence, there is uniform NCCN consensus that the intervention is appropriate
